# Supplementary material for: Biallelic Loss of Function Mutation in Sodium Channel Gene SCN10A in an Autism Spectrum Disorder Trio from Pakistan
Source: MDPI journal article supplement (doi:10.3390/genes13091633), 2022-09-11
Supplement: s1 [file s1]

**Supplementary Table S1: filtered variants identified in SMPA19:** All variants were validated by IGV (Integrated Genomics Viewer; Broad Institute) and by Sanger sequencing. Allele frequencies are from gnomAD v2.1.1 ([www. https://gnomad.broadinstitute.org/](https://gnomad.broadinstitute.org/); accessed Aug 2022). CADD Phred-like scores: <https://cadd.gs.washington.edu/>; M-CAP: PMID 27776117. T=tolerated; D=deleterious; B=benign; Poss D= possibly damaging.

| Variant | Chr | Coordinate<br>s (hg19) | Ref. | Alt. | Gene          | Variant Type  | cDNA/Amino Acid Change                      | gnomAD<br>All Freq. | gnomAD S.<br>Asian Freq. | Polyphen2<br>HumVar | Mutation<br>Taster | CADD/PHRED score<br>(Prediction) |
|---------|-----|------------------------|------|------|---------------|---------------|---------------------------------------------|---------------------|--------------------------|---------------------|--------------------|----------------------------------|
| 1       | 1   | 158576988              | T    | C    | OR10Z1        | Nonsynonymous | NM_001004478.2:exon1:c.760T>C:p.Cys254Arg   | 7.57E-05            | 6.21E-04                 | Poss D              | D                  | 24.3 (D)                         |
| 2       | 3   | 38802185               | C    | A    | <b>SCN10A</b> | Stopgain      | NM_001293306.2: exon7: c.937G>T; p. Gly313* | 3.98E-06            | 3.27E-05                 | -                   | D                  | 39 (D)                           |
| 3       | 3   | 47324525               | G    | A    | KLHL18        | Nonsynonymous | NM_025010.3:exon1:c.70G>A:p.Gly24Ser        | 1.32E-05            | 0                        | B                   | D                  | 24.1 (D)                         |
| 4       | 7   | 73922462               | G    | A    | GTF2IRD1      | Nonsynonymous | NM_001199207:exon2:c.52G>A:p.Asp18Asn       | 8.04E-06            | 3.27E-05                 | Poss D              | D                  | 23.6 (D)                         |
| 5       | X   | 140993480              | A    | G    | MAGEC1        | Nonsynonymous | NM_005462.4:exon4:c.290A>G:p.Gln97Arg       | 2.73E-05            | 2.62E-04                 | B                   | T                  | 10.26 (T)                        |

Variant 1 is in OR10Z1, which encodes an olfactory receptor, and can be excluded as a candidate. Variant 5, in MAGEC1, is a missense variant that doesn't pass the set criteria for predicted deleteriousness, and for Variants 3 and 4 the predictions are mixed. On the other hand, Variant 2, a stop gain in SCN10A, which has previously been reported in connection with ASD, is clearly a convincing candidate.

#### Variant Filtering:

As described in Harripaul et al. MedRXIV. Briefly, variants were compared against known dbSNP variants, and a convolutional neural network was trained to filter out poor calls based on several metrics (Van de Auwera et al, 2013), and minor allele frequency (MAF) in gnomAD (<https://gnomad.broadinstitute.org/>) of greater than  $1 \times 10^{-3}$  for autosomal recessive, or  $1 \times 10^{-5}$  for autosomal dominant/*de novo*, with a preference for variants that had no homozygotes in the gnomAD non-Neuro Cohort. For autosomal recessive variants, as the MAF used was on the conservative side, reanalysis was also performed using less stringent values ( $1 \times 10^{-3}$ ,  $1 \times 10^{-2}$ ), to see if any variants in known ASD/ID genes were missed under the stringent analysis.

Van der Auwera GA, Carneiro MO, Hartl C, Poplin R, Del Angel G, Levy-Moonshine A, et al. From FastQ data to high confidence variant calls: the Genome Analysis Toolkit best practices pipeline. Curr Protoc Bioinforma. 2013;43:11.10.1-11.10.33.
